# Supplementary material for: How the Choice of the Starting Time of the Observation Day May Affect Daily Precipitation Amounts and Extremes: Problem Analysis and Adjustment Methods
Source: Preprints.org preprint supplement (doi:10.20944/preprints202402.1207.v1), 2024-02-22
Supplement: Supplementary file 1 [file supplementary]

Supplementary Material

Article title: How the choice of the starting time of the observation day may affect daily precipitation amounts and extremes: problem analysis and adjustment methods

Francesca Becherini 1, Claudio Stefanini 2,*, Antonio della Valle 3, Francesco Rech 4, Fabio Zecchini 4 and Dario Camuffo 3

1 National Research Council-Institute of Polar Sciences, Via Torino 155, 30172 Venice Mestre, Italy;

2 Ca’ Foscari University of Venice, Dorsoduro 3246, 30123 Venice, Italy;

3 National Research Council-Institute of Atmospheric Sciences and Climate, Corso Stati Uniti 4, 35127 Padua, Italy;

4 Regional Agency for Environmental Protection and Prevention of Veneto, Via Ospedale Civile 24, 35121 Padua, Italy.

***** Correspondence: [stefac88@gmail.co](mailto:stefac88@gmail.co)m

**Table S1.** Yearly precipitation amount (mm) in the 1993-2022 period for the ARPAV stations in proximity of Padua.

| **Year** | **Station Acronym** | | | | | |
| --- | --- | --- | --- | --- | --- | --- |
| **Pd** | **Lg** | **Cm** | **Cd** | **Mr** | **Tr** |
| 1993 | 838.8 | 558.2 | 568.6 | 681.6 | 524.4 |  |
| 1994 | 687.6 | 733 | 741 | 654.4 |
| 1995 | 881 | 892.6 | 975.6 | 780 | 847.6 |  |
| 1996 | 986.2 | 959 | 773.8 | 806.6 | 1034.2 | 860.2 |
| 1997 | 653 | 664.4 | 599.8 | 584.8 | 603.6 | 645.8 |
| 1998 | 740.2 | 685 | 773.2 | 658.8 | 760 | 682 |
| 1999 | 549.6 | 883.2 | 943.6 | 741.2 | 1010.2 | 672.4 |
| 2000 | 829.8 | 681.4 | 816.2 | 829.4 | 838.4 | 617.6 |
| 2001 | 789.2 | 660.6 | 821.6 | 719.4 | 808.6 | 633.6 |
| 2002 | 1098.6 | 1090.6 | 1176.4 | 877.2 | 1151.2 | 891 |
| 2003 | 690.4 | 609 | 814.6 | 519 | 607 | 466.4 |
| 2004 | 1087.8 | 1020.6 | 1174.6 | 989.8 | 1031 | 825.8 |
| 2005 | 1076.8 | 1003.8 | 1095.2 | 997.6 | 909.4 | 781.4 |
| 2006 | 849 | 686.6 | 802.8 | 539.6 | 878.2 | 514.8 |
| 2007 | 740.2 | 628.4 | 738 | 856 | 743.2 | 553 |
| 2008 | 1256.6 | 906.2 | 1180 | 921.4 | 990.4 | 874.6 |
| 2009 | 996.2 | 983.6 | 1048.2 | 867.6 | 957.2 | 703.2 |
| 2010 | 1313.8 | 1128 | 1451 | 1095.8 | 1319 | 927.2 |
| 2011 | 664.2 | 592.4 | 728.6 | 443.2 | 704.8 | 578.2 |
| 2012 | 728.8 | 618.6 | 886.8 | 616.8 | 683.8 | 614.6 |
| 2013 | 1153.4 | 1066 | 1168 | 1129 | 1120.4 | 934 |
| 2014 | 1359.6 | 1290.8 | 1701.6 | 1178.2 | 1235.6 | 895 |
| 2015 | 551.4 | 525.4 | 598.8 | 645.4 | 618 | 584.6 |
| 2016 | 1122.2 | 983.4 | 1126.6 | 925.2 | 1046.4 | 807.6 |
| 2017 | 603 | 507.2 | 737.6 | 682.4 | 648 | 517.8 |
| 2018 | 1006.4 | 840.6 | 1029.8 | 788.8 | 945.4 | 743 |
| 2019 | 929.6 | 852.8 | 1178.2 | 966.6 | 884.2 | 777.8 |
| 2020 | 596.6 | 689 | 725 | 592.8 | 654.2 | 516.8 |
| 2021 | 674.4 | 647.8 | 801.4 | 545.4 | 570 | 616.6 |
| 2022 | 537 | 555.6 | 620.6 | 613.4 | 503.4 | 426.8 |

**Table S2.** Number of rainy days in the 1993-2022 period for the ARPAV stations in proximity of Padua.

| **Year** | **Station Acronym** | | | | | |
| --- | --- | --- | --- | --- | --- | --- |
| **Pd** | **Lg** | **Cm** | **Cd** | **Mr** | **Tr** |
| 1993 | 72 | 71 | 68 | 77 | 64 |  |
| 1994 | 66 | 68 | 72 | 65 |
| 1995 | 76 | 89 | 97 | 81 | 91 |  |
| 1996 | 84 | 95 | 76 | 88 | 97 | 90 |
| 1997 | 66 | 69 | 65 | 70 | 71 | 69 |
| 1998 | 70 | 72 | 73 | 73 | 77 | 66 |
| 1999 | 68 | 78 | 87 | 70 | 84 | 70 |
| 2000 | 85 | 78 | 80 | 79 | 83 | 71 |
| 2001 | 90 | 84 | 92 | 80 | 91 | 77 |
| 2002 | 96 | 93 | 102 | 84 | 88 | 94 |
| 2003 | 62 | 58 | 65 | 61 | 67 | 59 |
| 2004 | 93 | 92 | 99 | 91 | 88 | 89 |
| 2005 | 73 | 70 | 76 | 77 | 79 | 78 |
| 2006 | 68 | 69 | 69 | 60 | 69 | 58 |
| 2007 | 69 | 67 | 70 | 71 | 67 | 57 |
| 2008 | 99 | 89 | 104 | 90 | 97 | 86 |
| 2009 | 87 | 92 | 87 | 84 | 85 | 83 |
| 2010 | 109 | 114 | 109 | 108 | 106 | 105 |
| 2011 | 63 | 59 | 59 | 55 | 64 | 58 |
| 2012 | 73 | 67 | 76 | 65 | 67 | 62 |
| 2013 | 106 | 96 | 107 | 101 | 105 | 102 |
| 2014 | 110 | 115 | 119 | 110 | 105 | 103 |
| 2015 | 60 | 64 | 60 | 61 | 68 | 66 |
| 2016 | 90 | 84 | 100 | 93 | 90 | 82 |
| 2017 | 71 | 62 | 81 | 66 | 70 | 64 |
| 2018 | 87 | 89 | 96 | 87 | 92 | 87 |
| 2019 | 90 | 89 | 90 | 88 | 84 | 84 |
| 2020 | 76 | 74 | 82 | 73 | 77 | 69 |
| 2021 | 69 | 67 | 81 | 59 | 63 | 68 |
| 2022 | 66 | 68 | 76 | 65 | 67 | 52 |


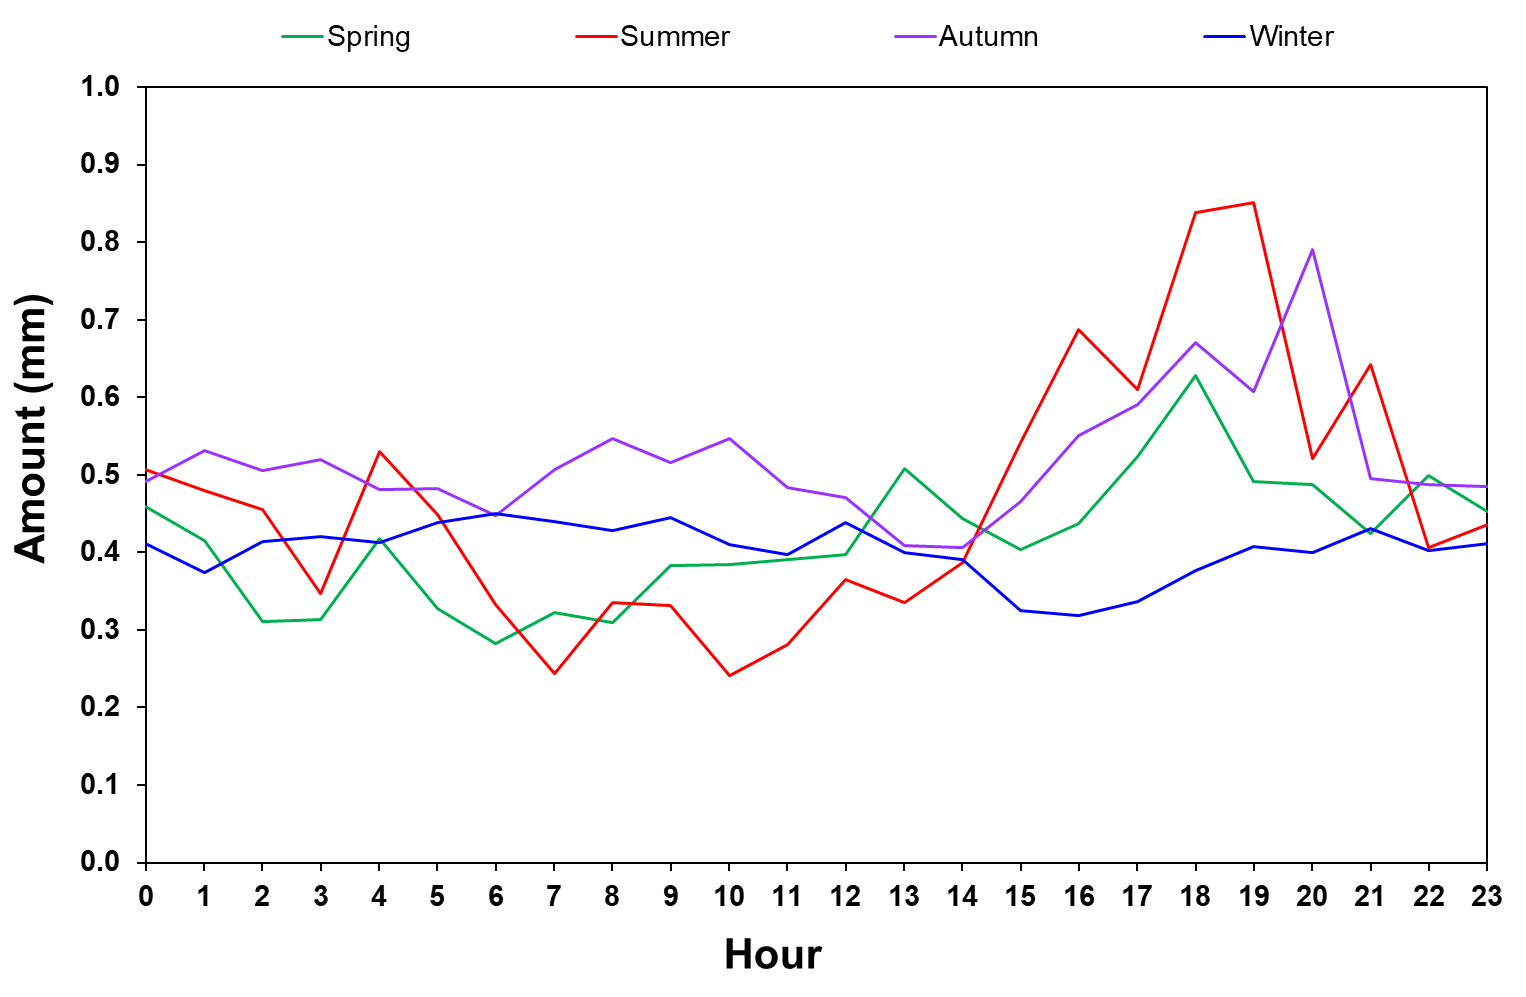


**Figure S1.** Seasonal precipitation intensity in Padua in the period 1994-2022.
